# Supplementary material
Source: MDPI journal article supplement (https://www.mdpi.com/search?q=gastroent-12-00013)
Supplement: s001 [file gastroent-12-00013-s001.pdf]

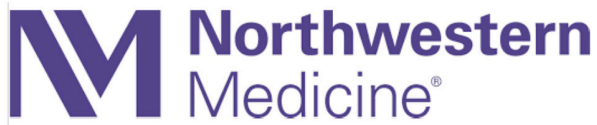

Resize font:  
⊕ | ⊞

Survey Queue

## Autoimmune Hepatitis and Liver Transplant Patient Survey

Please complete the survey below to the best of your ability.

Thank you so much for your time and participation!

Page 1 of 3

### Demographics

1 ID Number:

\* must provide value

This will be given to you

2 Age:

\* must provide value

in years

3 Sex:

\* must provide value

- ☐ Male  
☐ Female  
☐ Prefer not to say  
☐ Other

reset

4 Race/Ethnicity:

\* must provide value

- ☐ White  
☐ Black/African American  
☐ Hispanic/Latino  
☐ Native American/American Indian  
☐ Asian/Pacific Islander  
☐ Other

Check all that apply

Next Page >>

**Autoimmune Hepatitis and Liver Transplant Patient Survey**

Page 2 of 3

## Medical Information

**5 Are you an autoimmune hepatitis or liver transplant patient?**

\* must provide value

- ☐ Autoimmune Hepatitis (AIH)  
☒ Liver Transplant (LT)

[reset](#)

Note: if you received a liver transplant at any point in your life, you are a liver transplant patient

**6 What medication are you currently taking for your Liver Transplant (LT)?**

\* must provide value

- ☐ Azathioprine (Azasan)  
☐ Prednisone (Deltasone, Rayos, Prednisone Intenol)  
☐ Tacrolimus (Prograf, Protopic, Astagraf XL, Envarsus XR)  
☐ Sirolimus (Rapamune)  
☐ Everolimus (Zortress, Afinitor, Afinitor Disperz)  
☐ Mycophenolate (Myfortic, CellCept)  
☐ Cyclosporine (Neoral, Sandimmune, Gengraf)  
☐ Other

**7 Please indicate if you have or have had any of the following conditions:**

\* must provide value

- ☐ Esophageal varices  
☐ Jaundice  
☐ Ascites  
☐ Hepatic Encephalopathy  
☐ Portal Hypertension  
☐ Liver Cirrhosis  
☐ I have never had any of these conditions

**8 Please indicate if you have experienced any of the following complications of your immunosuppression medication:**

\* must provide value

- ☐ Infection  
☐ Cancer  
☐ Kidney problems  
☐ Side effects (weight gain, high blood pressure, vomiting, skin rash, etc.)  
☐ None of these  
☐ Other

**9 Please write down any other medical conditions you currently have:**

\* must provide value

[Expand](#)

If none, write "N/A"

**What was the date of your liver transplant?**

\* must provide value

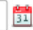

Today

M-D-Y

MM-DD-YYYY

**What was the reason for your liver transplant  
(disease or condition name listed for UNOS)?**

**10 Please indicate the number of liver transplant  
rejections in your lifetime:**

\* must provide value

- ☐ 0
- ☐ 1
- ☐ 2
- ☐ 3
- ☐ 4
- ☐ 5 or more

[reset](#)

[<< Previous Page](#)

[Next Page >>](#)

**Autoimmune Hepatitis and Liver Transplant Patient Survey**

Page 2 of 3

## Medical Information

**5 Are you an autoimmune hepatitis or liver transplant patient?**

\* must provide value

☒ Autoimmune Hepatitis (AIH)

☐ Liver Transplant (LT)

[reset](#)

Note: if you received a liver transplant at any point in your life, you are a liver transplant patient

**6 What medication are you currently taking for your Autoimmune Hepatitis (AIH)?**

\* must provide value

☐ Azathioprine (Azasan)

☐ Prednisone (Deltasone, Rayos, Prednisone Intensol)

☐

Tacrolimus (Prograf, Protopic, Astagraf XL, Envarsus XR)

☐ Sirolimus (Rapamune)

☐ Everolimus (Zortress, Afinitor, Afinitor Disperz)

☐ Mycophenolate (Myfortic, CellCept)

☐ Cyclosporine (Neoral, Sandimmune, Gengraf)

☐ Other

**7 Please indicate if you have or have had any of the following conditions:**

\* must provide value

☐ Esophageal varices

☐ Jaundice

☐ Ascites

☐ Hepatic Encephalopathy

☐ Portal Hypertension

☐ Liver Cirrhosis

☐ I have never had any of these conditions

**8 Please indicate if you have experienced any of the following complications of your immunosuppression medication:**

\* must provide value

☐ Infection

☐ Cancer

☐ Kidney problems

☐ Side effects (weight gain, high blood pressure, vomiting, skin rash, etc.)

☐ None of these

☐ Other

**9 Please write down any other medical conditions you currently have:**

\* must provide value

[Expand](#)

If none, write "N/A"

**10 Please indicate the number of autoimmune hepatitis flare-ups in your lifetime:**

**\* must provide value**

- ☐ 0
- ☐ 1
- ☐ 2
- ☐ 3
- ☐ 4
- ☐ 5 or more

[reset](#)

[<< Previous Page](#)

[Next Page >>](#)

## AutoImmune Hepatitis and Liver Transplant Patient Survey

Page 3 of 3

### Survey

Please indicate your level of agreement with the following statements:

11 I take my immunosuppression medication(s) without difficulty or concern.

\* must provide value

- ☐ 1 (Strongly disagree)  
☐ 2 (Disagree)  
☐ 3 (Neutral)  
☐ 4 (Agree)  
☐ 5 (Strongly agree)

[reset](#)

12 I know what side effects to expect from my immunosuppressive medication(s).

\* must provide value

- ☐ 1 (Strongly disagree)  
☐ 2 (Disagree)  
☐ 3 (Neutral)  
☐ 4 (Agree)  
☐ 5 (Strongly agree)

[reset](#)

13 I experience unpleasant side effects from my immunosuppressive medication(s).

\* must provide value

- ☐ 1 (Strongly disagree)  
☐ 2 (Disagree)  
☐ 3 (Neutral)  
☐ 4 (Agree)  
☐ 5 (Strongly agree)

[reset](#)

14 I feel financially burdened by the immunosuppressive medication(s) I need to take.

\* must provide value

- ☐ 1 (Strongly disagree)  
☐ 2 (Disagree)  
☐ 3 (Neutral)  
☐ 4 (Agree)  
☐ 5 (Strongly agree)

[reset](#)

15 My physician and I have discussed the possibility of withdrawing my immunosuppressive medication(s).

\* must provide value

- ☐ 1 (Strongly disagree)  
☐ 2 (Disagree)  
☐ 3 (Neutral)  
☐ 4 (Agree)  
☐ 5 (Strongly agree)

[reset](#)

**16 I want to attempt withdrawal of immunosuppressive therapy.**

**\* must provide value**

- ☒ 1 (Strongly disagree)  
☐ 2 (Disagree)  
☐ 3 (Neutral)  
☐ 4 (Agree)  
☐ 5 (Strongly agree)

[reset](#)

**17 Please rank the most important reason you do not want to attempt immunosuppression withdrawal:**

**\* must provide value**

- ☐ I do not want to risk a flareup  
☐ I do not want to risk needing a liver transplant  
☐ I do not want to take more medications if I fail withdrawal  
☐ I do not want to "rock the boat"  
☐ I am doing well on my immunosuppressants  
☐ Other

[reset](#)

**18 Please rank the 2nd most important reason you do not want to attempt immunosuppression withdrawal:**

**\* must provide value**

- ☐ I do not want to risk a flareup  
☐ I do not want to risk needing a liver transplant  
☐ I do not want to take more medications if I fail withdrawal  
☐ I do not want to "rock the boat"  
☐ I am doing well on my immunosuppressants  
☐ Other

[reset](#)

[<< Previous Page](#)

[Submit](#)

**16 I want to attempt withdrawal of immunosuppressive therapy.**

\* must provide value

- ☐ 1 (Strongly disagree)
- ☐ 2 (Disagree)
- ☐ 3 (Neutral)
- ☒ 4 (Agree)
- ☐ 5 (Strongly agree)

[reset](#)

**18 Please rank the 2nd most important reason you want to attempt immunosuppression withdrawal:**

\* must provide value

- ☐ I want to stop experiencing side effects from my immunosuppressants
- ☐ I want to avoid the risk of major complications from my immunosuppressants (cancer, kidney problems, infection, etc.)
- ☐ I want to decrease the money I spend on immunosuppressants
- ☐ I want to avoid taking pills for the rest of my life
- ☐ Other

[reset](#)

**17 Please rank the most important reason you want to attempt immunosuppression withdrawal:**

\* must provide value

- ☐ I want to stop experiencing side effects from my immunosuppressants
- ☐ I want to avoid the risk of major complications from my immunosuppressants (cancer, kidney problems, infection, etc.)
- ☐ I want to decrease the money I spend on immunosuppressants
- ☐ I want to avoid taking pills for the rest of my life
- ☐ Other

[reset](#)

[<< Previous Page](#)

[Submit](#)
